# Supplementary material for: A Retrospective Analysis of Agricultural Herbicides in Surface Water Reveals Risk Plausibility for Declines in Submerged Aquatic Vegetation
Source: Toxics. 2017 Sep 6;5(3):21. doi: 10.3390/toxics5030021 (PMC5634704; doi:10.3390/toxics5030021)
Supplement: Supplementary file 1 [file toxics-05-00021-s001.xls]

## Sheet: Sheet1
Article Title: A Retrospective Analysis of Agricultural Herbicides in Surface Water Reveals Risk Plausibility for Declines in Submerged Aquatic Vegetation
Journal Name: Toxics
Author names: Kelly W. Powell, W. Gregory Cope, Catherine E. LePrevost, Tom Augspurger, Annette M. McCarthy, and Damian Shea
Corresponding Author: Catherine E. LePrevost, Department of Applied Ecology, North Carolina State University, Raleigh, NC, USA; e-mail: celeprev@ncsu.edu
Supplemental Data Table 1 Herbicide concentrations (ug/L) measured in water samples collected from the 26 sites in the Albemarle-Pamlico Estuary System in 2000
		Tar River - Main Stem													Tar River - Tributary								Pamlico River										Pungo River
Sample ID		0517TR1	0517TR2	0606TR1	0606TR2	0615TR1	0615TR2	0705TR1	0705TR2	0705TR3	0705TR4	Geometric Mean	Maximum		0505TRT1	0505TRT2	0505TRT3	0505TRT4	0505TRT5	Geometric Mean	Maximum		0607PR1	0607PR2	0607PR3	0607PR4	0607PR5	0607PR6	0607PR7	Geometric Mean	Maximum		0628PU1	0628PU2	0628PU3	0628PU4	Geometric Mean	Maximum
Volume (mL)		520	504	540	531	535	518	500	501	534	499				989	995	972	990	990				508	532	479	508	490	531	523				529	538	499	535
Collection Date		2000-05-17	2000-05-17	2000-06-06	2000-06-06	2000-06-15	2000-06-15	2000-07-05	2000-07-05	2000-07-05	2000-07-05				2000-05-05	2000-05-05	2000-05-05	2000-05-05	2000-05-05				2000-06-06	2000-06-06	2000-06-06	2000-06-06	2000-06-06	2000-06-06	2000-06-06				2000-06-28	2000-06-28	2000-06-28	2000-06-28
alachlor		0.29	0.104	0.033	0.018	0.035	0.016	nd	nd	0.008	0.006	0.0288623	0.29		6.1	2.4	4	0.91	1.7	2.46274	6.1		0.026	0.077	0.059	nd	0.026	0.012	nd	0.0326057	0.077		0.24	0.16	0.065	0.34	0.170679	0.34
2,6-diethylaniline		0.041	0.02	nd	nd	0.01	0.008	nd	nd	nd	nd	0.0160039	0.041		0.8	0.55	0.69	0.12	0.25	0.390737	0.8		0.019	nd	nd	nd	nd	nd	nd	0.019	0.019		nd	nd	nd	nd	nd	nd
atrazine		0.35	0.17	0.11	0.08	0.21	0.06	nd	nd	nd	nd	0.13695	0.35		41	6.5	3.1	2.7	8.5	7.17081	41		0.02	nd	0.011	0.019	0.008	nd	nd	0.0135228	0.02		0.037	0.014	nd	0.019	0.0214303	0.037
atrazine-desethyl		0.098	0.025	0.06	0.1	0.006	0.019	nd	nd	nd	nd	0.0344644	0.1		1.6	0.49	0.5	0.18	0.22	0.434707	1.6		nd	nd	nd	nd	nd	nd	nd	nd	nd		nd	nd	nd	nd	nd	nd
benfluralin		nd	nd	nd	nd	nd	nd	nd	nd	nd	nd	nd	nd		0.015	0.008	nd	0.006	nd	0.00896281	0.015		nd	nd	nd	nd	nd	nd	nd	nd	nd		0.061	0.03	nd	0.026	0.0362361	0.061
cyanazine		nd	nd	nd	nd	0.048	0.029	0.034	0.016	0.01	nd	0.0237601	0.048		0.062	0.025	0.008	nd	0.004	0.0149235	0.062		nd	nd	nd	nd	nd	nd	nd	nd	nd		nd	nd	nd	nd	nd	nd
metolachlor		0.14	0.061	0.007	0.015	0.015	0.011	0.012	0.011	0.019	0.007	0.0174364	0.14		82	9.4	3.9	2.1	1.1	5.86575	82		0.64	0.27	0.41	0.016	0.035	0.48	0.027	0.163415	0.64		0.081	0.018	0.026	0.042	0.0355218	0.081
metribuzin		nd	nd	nd	nd	nd	nd	nd	nd	nd	nd	nd	nd		0.39	0.21	0.045	0.06	0.022	0.0865793	0.39		nd	nd	nd	nd	nd	nd	nd	nd	nd		nd	0.009	nd	nd	0.009	0.009
napropamide		nd	nd	nd	nd	nd	nd	nd	nd	nd	nd	nd	nd		0.095	0.052	0.02	nd	0.014	0.0342942	0.095		nd	nd	nd	nd	nd	nd	nd	nd	nd		nd	0.055	nd	nd	0.055	0.055
pendimethalin		nd	nd	nd	nd	nd	nd	nd	nd	nd	nd	nd	nd		0.11	0.06	0.028	0.005	0.02	0.0284014	0.11		nd	nd	nd	nd	nd	nd	nd	nd	nd		nd	nd	nd	nd	nd	nd
prometon		nd	nd	nd	nd	nd	nd	nd	nd	nd	nd	nd	nd		0.46	0.064	0.031	0.01	nd	0.0549636	0.46		nd	nd	nd	nd	nd	nd	nd	nd	nd		nd	0.04	0.021	nd	0.0289828	0.04
simazine		0.082	0.009	0.041	0.03	0.078	0.13	0.041	0.14	0.065	0.055	0.0534095	0.14		0.091	0.044	0.008	0.026	nd	0.0302092	0.091		0.08	0.17	0.11	0.045	0.09	0.73	0.065	0.12812	0.73		nd	nd	nd	nd	nd	nd
Quality Assurance-Surrogate Recoveries (%)
HCH,alpha-d6		94.7397	62	98.4434	65.6963	80.3456	73.6872	73.1007	85.7799	79.1351	85.7866				72.6211	91.1649	69.5	77.1395	79.7203				85.2623	83.4304	93.481	69.5957	89.5744	87.6446	73.1659				89.6631	77.8595	88.7	83.5136
diazinon-d10		88.8324	78.6	73.0317	96.1568	87.4739	91.751	69.07	77.4	77.5	93				69.9246	93.2567	73.7699	83.2106	89				82.2511	88.6796	86.2302	86.1532	87.0374	84.2	66.6927				74.9288	82.4155	82.7804	71.5691
turbuthylazine		101.454	99.1	103.709	88.7172	87	94.7364	88	98	102	98.6				87.3398	88.9276	102.4	80.1703	103.2				88.3499	94.7364	91.4164	88.2193	90.2929	103.2	62.7848				91	90.1374	110.6	84.436
Note: This table does not display data for all herbicides and metabolites measured in this study. Specifically, data are not shown for some herbicides that were not detected (nd < 0.001 ug/L) and for an herbicide metabolite (cyanazine-amide) measured at the Beaufort County farm site only
